# Supplementary material
Source: PubMed Central journal article supplement (PMC2323462)
Supplement: pgen.0030180.sg003.pdf [file pgen.0030180.sg003.pdf]

>dapk3\_human gi|2911155:94-1458 Homo sapiens mRNA for ZIP-kinase, complete cds, 1365 bases, A83C11AD checksum.

ATGTCCACGTTTCAGGCAGGAGGACGTGGAGGACCATTATGAGATGGGGGA  
 GGAGCTGGGCAGCGGCCAGTTTGGCATCGTGCGGAAGTGCCGGCAGAAGG  
 GCACGGGCAAGGAGTACGCAGCCAAGTTCATCAAGAAGCGCCGCCTGTCA  
 TCCAGCCGGCGTGGGGTGAGCCGGGAGGAGATCGAGCGGGAGGTGAACAT  
 CCTGCGGGAGATCCGGCACCCCAACATCATCACCCCTGCACGACATCTTCG  
 AGAACAAGACGGACGTGGTCTCATCCTGGAGCTGGTCTCTGGCGGGGAG  
 CTCTTTGACTTCTGGCGGAGAAAGAGTCGCTGACGGAGGACGAGGCCAC  
 CCAGTTCTCAAGCAGATCCTGGACGGCGTTCCTACTACCTGCACTCTAAGC  
 GCATCGCACACTTTGACCTGAAGCCGGAAAACATCATGCTGCTGGACAAG  
 AACGTGCCCAACCCACGAATCAAGCTCATCGACTTCGGCATCGCGCACAA  
 GATCGAGGCGGGGAACGAGTTCAAGAACATCTTCGGCACCCCGGAGTTTG  
 TGGCCCCAGAGATTGTGAACTATGAGCCGCTGGGCCTGGAGGCGGACATG  
 TGGAGCATCGGTGTCATCACCTATATCCTCCTGAGCGGTGCATCCCCGTT  
 CCTGGGCGAGACCAAGCAGGAGACGCTCACCAACATCTCAGCCGTGAACT  
 ACGACTTCGACGAGGAGTACTTCAGCAACACCAGCGAGCTGGCCAAGGAC  
 TTCATTCGCCGGCTGCTCGTCAAAGATCCCAAGCGGAGAATGACCATTGC  
 CCAGAGCCTGGAACATTCTGGATTAAGGCGATCCGGCGGCGGAACGTGC  
 GTGGTGAGGACAGCGGCCGCAAGCCCGAGCGGCGGCCTGAAGACCACG  
 CGTCTGAAGGAGTACACCATCAAGTCGCACTCCAGCTTGCCGCCCAACAA  
 CAGCTACGCCGACTTCGAGCGCTTCTCCAAGGTGCTGGAGGAGGCGGCGG  
 CCGCCGAGGAGGGCCTGCGCGAGCTGCAGCGCAGCCGGCGGCTCTGCCAC  
 GAGGACGTGGAGGCGCTGGCCGCCATCTACGAGGAGAAGGAGGCCTGGTA  
 CCGCGAGGAGAGCGACAGCCTGGGCCAGGACCTGCGGAGGCTACGGCAGG  
 AGCTGCTCAAGACCGAGGCGCTCAAGCGGCAGGCGCAGGAGGAGGCCAAG  
 GCGCGCTGCTGGGGACCAGCGGCCTCAAGCGCCGCTTCAGCCGCCTGGA  
 GAACCGCTACGAGGCGCTGGCCAAGCAAGTAGCCTCCGAGATGCGCTTCG  
 TGCAGGACCTCGTGCGCGCCCTGGAGCAGGAGAAGCTGCAGGGCGTGGAG  
 TGCGGGCTGCGCTAG

>dapk3\_chimpanzee gi|114674686:120-1484 PREDICTED: Pan troglodytes death-associated protein kinase 3 (DAPK3), mRNA, 1365 bases, 40B4791E checksum.

ATGTCCACGTTTCAGGCAGGAGGACGTGGAGGACCATTATGAGATGGGGGA  
 GGAGCTGGGCAGCGGCCAGTTTGGCATCGTGCGGAAGTGCCGGCAGAAGG  
 GCACGGGCAAGGAGTACGCAGCCAAGTTCATCAAGAAGCGCCGCCTGTCA  
 TCCAGCCGGCGTGGGGTGAGCCGGGAGGAGATCGAGCGGGAGGTGAACAT  
 CCTGCGGGAGATCCGGCACCCCAACATCATCACCCCTGCACGACATCTTCG  
 AGAACAAGACGGACGTGGTCTCATCCTGGAGCTGGTCTCTGGCGGGGAG  
 CTCTTTGACTTCTGGCGGAGAAGGAGTCGCTGACGGAGGACGAGGCCAC  
 CCAGTTCTCAAGCAGATCCTGGACGGCGTTCCTACTACCTGCACTCTAAGC  
 GCATCGCACACTTTGACCTGAAGCCGGAAAACATCATGCTGCTGGACAAG  
 AACGTGCCCAACCCACGAATCAAGCTCATCGACTTCGGCATCGCGCACAA  
 GATCGAGGCGGGGAACGAGTTCAAGAACATCTTTGGCACCCCGGAGTTTG  
 TGGCCCCAGAGATTGTGAACTATGAGCCGCTGGGCCTGGAGGCGGACATG  
 TGGAGCATCGGTGTCATCACCTACATCCTCCTGAGCGGTGCATCCCCGTT  
 CCTGGGCGAGACCAAGCAGGAGACGCTCACCAACATCTCAGCCGTGAACT  
 ACGACTTCGACGAGGAGTACTTCAGCAACACCAGCGAGCTGGCCAAGGAC  
 TTCATTCGCCGGCTGCTCGTCAAAGATCCCAACGGAGAATGACCATTGC

CCAGAGCCTGGAACATTCCTGGATTAAGGCGATCCGGCGGCGGAACGTGC  
 GTGGTGAGGACAGCGGCCGCAAGCCCGAGCGGCGGCCTGAAGACCACG  
 CGTCTGAAGGAGTACACCATCAAGTCGCACTCCAGCTTGCCGCCAACAA  
 CAGCTACGCCGACTTCGAGCGCTTCTCCAAGGTGCTGGAGGAGGCGGCGG  
 CCGCCGAGGAGGGCCTGCGCGAGCTGCAGCGCAGCCGGCGGCTCTGCCAC  
 GAGGACGTGGAGGCGCTGGCCGCCATCTACGAGGAGAAGGAGGCCTGGTA  
 CCGCGAGGAGAGCGACAGCCTGGGCCAGGACCTGCGGAGGCTACGGCAGG  
 AGCTGCTCAAGACCGAGGCGCTCAAGCGGCAGGCGCAGGAGGAGGCCAAG  
 GGC GCGCTGCTGGGGACCAGCGGCCTCAAGCGCCGCTTCAGCCGCCTGGA  
 GAACCGCTACGAGGCGCTGGCCAAGCAAGTAGCCTCCGAGATGCGCTTCG  
 TGCAGGACCTCGTGC GCGCCCTGGAGCAGGAGAAGCTGCAGGGCGTGGAG  
 TCGGGGCTGCGCTAG

>dapk3\_macaque gi|109122940:235-1599 PREDICTED: *Macaca mulatta* death-associated protein kinase 3, transcript variant 2 (DAPK3), mRNA, 1365 bases, E9AF3C3A checksum.

ATGTCCACGTTTCAGGCAGGAGGACGTGGAGGACCATTATGAGATGGGGGA  
 GGAGCTGGGCAGCGGCCAGTTTTCGATCGTGC GGAAGTGCCGGCAGAAGG  
 GAACGGCAAGGAGTACGCGGCCAAGTTCATCAAGAAGCGCCGCCTGTCA  
 TCCAGCCGGCGCGGGGTGAGCCGGGAGGAGATCGAGCGGGAGGTGAACAT  
 CCTGCGGGAGATCCGGCACCCCAACATCATCACCTGCACGACATCTTCG  
 AGAACAAAGACGGACGTAGTCCCTCATCCTGGAGCTGGTCTCTGGCGGGGAG  
 CTCTTCGACTTCTGGCGGAGAAGGAGTTCGCTCACGGAGGACGAGGCCAC  
 TCAGTTCCCTCAAGCAGATCCTGGACGGCGTCCACTACCTGCACTCCAAGC  
 GCATTGCGCACTTTGACCTGAAGCCGAAAACATCATGCTGCTGGACAAG  
 AACGTGCCCAACCCACGCATCAAGCTCATCGACTTCGGCATCGCGCACAA  
 AATCGAGGCGGGGAATGAGTTCAAGAACATCTTCGGCACCCAGAGTTTG  
 TGGCCCCAGAGATTGTGAACTATGAGCCGCTGGGCCTGGAGGCGGACATG  
 TGGAGCATCGGCGTCATCACCTACATCCTCCTGAGCGGTGCATCCCCGTT  
 CCTGGGCGAGACCAAGCAGGAGACGCTCACCAACATCTCAGCCGTGAACT  
 ATGACTTCGACGAGGAGTACTTCAGCAACACCAGTGAGCTGGCCAAGGAC  
 TTCATTCGCCGGCTGCTCGTCAAAGATCCCAAGCAGAGAATGACCATTGC  
 CCAGAGCCTGGAACATTCCTGGATTAAGGCCATCCGGCGGCGGAACGTGC  
 GTGGCGAGGACAGCGGCCGCAAGCCGAACGGCGGCGCCTGAAGACCACG  
 CGTCTGAAGGAGTACACCATCAAGTCGCACTCCAGCATGCCGCCAACAA  
 CAGCTACGCCAACTTCGAGCGCTTCTCCAAGGTGCTGGAGGAGGTGGCGG  
 CGGCCGAGGAGGGCCTGCGTGAGCTGGAGCGAAGCCGGCGGCTCTGCCAT  
 GAGGACGTGGAGGCGCTGGCCGCCATCTACGAGGAGAAGGAGGCCTGGTA  
 CCGCGAGGAGAGCGACAGCCTGGGCCAGGACCTGCGGCGGCTGCGGCAGG  
 AGCTGCTCAAGACCGAGGCACTCAAGCGGCAGGCGCAGGAGGAGGCCAAG  
 GGC GCGCTGCTGGGGACCAGCGGCCTCAAGCGCCGCTTCAGCCGCCTAGA  
 GAACCGCTACGAGGCGCTGGCCAAGCAGGTGGCCTCCGAGATGCGCTTCG  
 TACAGGACCTGGTGC GCGCCCTGGAGCAGGAGAAGCTGCAGGGCGTGGAG  
 TCGGGGCTGCGCTAG

>dapk3\_Tupaia 107812812:(1620-1260+1187-1058+844+796+201+175)+108226212:(2038-1886+1173-1128+640-104) *Tupaia belangeri* (northern tree shrew) Death-associated protein kinase 3 (DAP kinase 3; DAP-like kinase; Dlk; ZIP-kinase); exons from two non-contiguous genomic contigs; partial missing N-end, 1303 bases, B19CDD48 checksum.

CGGCCAGTTCGCCATCGTCCGCAAGTGCCGGCAGAAGGGCACGGGGAAGG  
 AGTTCGCCGCCAAGTTCATCAAGAAGCGGCGTCTGTCTGCCAGCCGGCGG  
 GCGGTGAGCCGGGAGGAGATCGAGCGGGAGGTGGACATCCTGCCGGGAGAT  
 CCGGCACCCCAACATCATCGCGCTGCACGACATCTTCGAGAACC GGACGG  
 ACGTGGTGCTGATCCTGGAGCTGGTGTCTGGGCGGCGAGCTCTTCGACTTC  
 CTGGCCGAGAAGGAGTCGCTGACCGAGGACGAGGCCACCCAGTTCCTGAA  
 GCAGATCCTGGACGGCGTGCCTACTGACTCCAAGCGCATCGCCCACT  
 TCGACCTCAAGCCAGAGAACATCATGCTACTGGACAAGGACGTGCCCAAC  
 CCGCGCATCAAGCTCATCGACTTCGGCATCGCCACAAGATCGAGGCGGG  
 GAACGAGTTC AAGAACATCTTCGGCACCCCGGAGTTCGTGGCTCCTGAGA  
 TCGTCAACTACGAGCCCTGGGCCTGGAGGCCGACATGTGGAGCATCGGC  
 GTCATCACCTACATCCTCCTGAGCGGCGCGTCCCCGTTCTGGGCGAGAC  
 CAAGCAGGAGACCCTGACCAACATCTCGGCGGTGAACTACGACTTCGATG  
 AGGAGTACTTCGGCAACACCAGCGAGCTGGCCAAGGACTTCATCCGCCGC  
 CTGCTGGTCAAAGACCCCAAGAGGAGGATGACCATCGCCCAGAGCCTGGA  
 GCACTCCTGGATCAAGGCGATCCGGCGGCGGAACGTGCGCAGCGAGGACA  
 GCGGCCGGAAGCCGGAGCGGCGGCGCCTGAAGACGGCGCGGCTGAAGGAG  
 TACACCATCAAGTGCCTCCAGCATGCCGCCAACAACACCTACGTCAA  
 CTTTCGAGCGCTTCTCCAAGGTGCTGGAGGAGGTGGCGGCGGCCGAGGAGG  
 GCCTGCGCGAGCTGGAGCGCAGCCGGCGGCTGTGCCACGAGGACGTGGCG  
 GCGCTGACGGCCATCTACGAGGAGAAGGAGGCTGGTACAGGGAGGAGCA  
 CGAGAGCATCGGCCAGGACCTGCGGCGGCTGCGGCAGGAGCTGCACAAGA  
 CCGAGGCGCTCAAGCGCCAGGCGCAGGAGGAGCCAAGGGCGCCCTGCTG  
 GGGGCCGGCGGGCTGCGGCGCCGCTCAGCCGCTGGAGAACCCTACGA  
 GCGCTGGCCAAGCAGGTGGCCTCCGAGATGCGCTTCGTGCAGGACCTGG  
 TGGCGGCCATGGAGCAGGAGAAGCTGCAGGCAGTGGGGTGTGGCCTCCGC  
 TAG

>DAPK3\_RAT gi|3250894:114-1460 Rattus norvegicus mRNA for DAP kinase 3 (DLK,  
 ZIPK), 1347 bases, 8F64DA2D checksum.

ATGTCCACGTT CAGGCAGGAGGACGTTGAGGACCATTATGAGATGGGAGA  
 GGAGCTTGGCAGCGGCCAGTTCGCCATCGTGC GCAAGTGCCAGCAGAAGG  
 GCACCGGCATGGAGTACGCGGCCAAGTTCATAAAGAAGCGGCGCCTGCCG  
 TCCAGCCGGCGCGGTGTGAGCCGTGAGGAGATCGAGCGCGAGGTGAGCAT  
 CCTGCGCGAGATCCGCCACCCCAACATCATCACGCTGCACGATGTGTTCG  
 AGAACAAAGACAGATGTGGTGCTGATCTTGGAGCTGGTGTCCGGCGGCGAA  
 CTTTTTCGACTTTCTGGCTGAGAAGGAGTCACTGACAGAGGATGAGGCCAC  
 GCAGTTCCTCAAGCAGATCCTGGACGGTGTCCACTACCTGCACTCCAAGC  
 GCATCGCGCACTTTGACCTGAAGCCGGAGAACATCATGTTGCTGGACAAG  
 CATGCAGCCAGCCACGCATTAAGCTCATCGACTTTGGCATCGCGCACAG  
 GATCGAGGCCGGTAGCGAGTTC AAGAACATCTTTGGCACGCCAGAGTTCG  
 TCGCCCCTGAGATTGTAAACTATGAACCACCTTGGCTTGAAGCTGATATG  
 TGGAGCATCGGCGTCATCACCTACATCCTCCTGAGCGGGGCTTCCCCATT  
 CCTGGGGGAGACCAAGCAGGAAACGCTGACAAACATCTCGGCTGTGAACT  
 ATGACTTTGATGAAGAGTACTTCAGCAGCACCAGTGAAGTGGCCAAGGAC  
 TTCATCCGAAGGCTGCTGGTCAAAGATCCCAAGAGGAGGATGACCATCGC  
 ACAGAGCCTGGAGCATTCCTGGATCAAGGTTCCGCCGGCGTGAGGACGGCG  
 CCCGGAAGCCAGAGCGACGCCGACTGCGCGCGGCGCGCCTGCGCGAGTAC  
 AGTCTCAAGTGCCTCAAGCATGCCCGGAAACACGAGCTACGCCAGCTT

CGAGCGCTTCTCGCGCGTGCTGGAGGACGTGGCGGCGGCGGAGCAGGGGC  
 TGC GCGAGCTGCAGCGGGGCCGGCGGCAGTGCCGGGAGCGCGTGTGCGCG  
 CTGCGCGTGCGTGGCTGCGGAACAGCGGGAGGCGCGCTGCCGCGACGGGAGCGC  
 CGGGCTAGGCCGCGACCTGCGACGCCTGCGCACGGAGCTGGGTGCGACCG  
 AGGCTCTGCGCACGCGCGCAGGAGGAGGCACGGGCAGCGCTCTTGGGC  
 GCTGGTGGCCTGAAACGTCGCCTGTGTGCGCTTGAGAACCGCTACGACGC  
 GCTAGCCGCGACAGGTGGCTGCTGAGGTGCAATTTCGTGCGCGATCTGGTAC  
 GCGCGCTGGAGCAGGAGCGGCTGCAGGCCGAGTGCGGCGTGCGCTAG  
 >DAPK3\_MOUSE gi|2911153:10-1356 Mus musculus mRNA for ZIP-kinase, complete cds,  
 1347 bases, 9466C0F1 checksum.  
 ATGTCCACATTCAGGCAAGAGGATGTTGAGGACCATTATGAGATGGGAGA  
 GGAGCTTGGCAGTGGCCAATTTGCCATCGTGCGCAAGTGCCAGCAGAAGG  
 GCACGGGCATGGAGTATGCAGCCAAGTTCATCAAGAAGCGGCGCCTGCCA  
 TCCAGCCGGCGCGGTGTGAGCCGGGAGGAGATCGAACGCGAGGTGAGCAT  
 CCTGCGCGAGATCCGCCACCCCAACATCATAACACTGCATGACGTGTTCG  
 AGAACAAAGACAGATGTGGTGTGATCCTGGAGCTGGTGTCCGGTGGCGAG  
 CTTTTCGACTTCTGGCCGAGAAGGAGTCATTGACGGAGGATGAGGCCAC  
 GCAGTTCCTCAAACAAATCCTAGACGGTGTCCACTACCTGCACTCCAAGC  
 GCATCGCACACTTTGACCTGAAGCCCGAGAACATCATGTTGCTGGACAAG  
 CACGCAGCCAGCCCCGCATTAAGCTCATCGACTTTGGCATCGCGCACAG  
 GATCGAGGCTGGCAGCGAGTTCAAGAACATCTTTGGCACACCCGAGTTTG  
 TCGCCCCCGAGATCGTGAACATATGAGCCACTTGGCTTGGAGGCTGACATG  
 TGGAGCATTTGGCGTCATCACCTACATCCTCCTGAGCGGAGCGTCCCCATT  
 CCTGGGCGAGACCAAGCAGGAGACGCTGACGAACATCTCAGCAGTGAAC  
 ATGACTTTGATGAGGAATACTTACAGCAGCACCAGCGAGCTGGCCAAGGAC  
 TTCATCCGCGAGGCTGCTGGTCAAAGACCCCAAGAGGAGGATGACCATCGC  
 ACAGAGCCTGGAGCATTCCTGGATCAAGGTGCGCAGGCGCGAGGACGGCG  
 CCCGGAAGCCAGAGCGACGGCGGCTGCGCGCCGCGCGCCTGCGCGAGTAC  
 AGCCTCAAGTCCCCTCGAGCATGCCGCGCAACACGAGCTACGCCAGCTT  
 CGAGCGCTTCTCACGCGTGCTGGAGGACGTGGCGGCGGCGAGCAGGGGC  
 TGC GCGAGCTGCAGCGAGGCAGGCGCCAGTGCCGGGAGCGCGTGTGTGCG  
 CTGCGCGCGGCCGCGGAGCAGCGGGAGGCGCGCTGCCGCGACGGGAGCGC  
 AGGGCTAGGGCGCGACCTGCGACGCCTGCGCACGGAGCTGGGGCGCACCG  
 AGGCTCTGCGCACGCGCGCAGGAGGAGGCGCGGGCGGCGCTGTTGGGT  
 GCCGGGGCCTGAAGCGTCGCCTGTGTGCGCTTGAGAACCGTTACGACGC  
 GCTAGCCGCTCAGGTGGCCGCTGAGGTGCAATTTCGTGCGCGACCTGGTGC  
 GTGCGCTGGAGCAGGAACGGCTGCAGGCTGAGTGCGGCGTGCGCTAG  
 >dapk3\_cavia assembled\_TDB-  
 reads:((812701167+816150362):())+((1587132918+1593835765+760990457+1586592910+81  
 2549142+1588856408+816143923+1589066801+1594277302+1603724064+1632773638+1643288  
 589+812697591+1617911338+781611623):(2348-1984+1892-1763+1671-1623+1549-  
 1523+922-769))+((1583699030+810921921):(914-958+1033-1569))+EST\_91731898:1-  
 598+EST\_148201962:286-384 Cavia porcellus (guinea pig) Death-associated protein  
 kinase 3 (DAP kinase 3; DAP-like kinase; Dlk; ZIP-kinase); partial missing N-  
 end, 1347 bases, 6D922A14 checksum.  
 GAGGACGTGGAGGACCACTATGAGATGGGGGAGGAGCTGGGCAGCGGCCA  
 GTTTGCCATCGTGCGCAAGTGCCGTGAGAAGGGCACGGGCAGGGAGTACG  
 CGGCCAAGTTCATCAAGAAGCGGCGCCTGTGCTCCAGCCGGCGCGGGGTG

AGCCGCGAGGAGATCGAGCGCGAGGTGAGCATCCTGCGGGAGATCCGGCA  
 CCCAACATCATCACACTGCACGATGTCTTCGAGAACAAGACGGACGTGG  
 TCCTCATCCTGGAGCTGGTGTCCGGCGGCGAGCTCTTTGACTTCCTGGCC  
 GAGAAGGAGTCGCTGACCGAGGACGAGGCCACGCAGTTCCTCAAGCAGAT  
 CCTGGACGGCGTCCACTACCTGCACTCCAAGCGCATTGCCCACTTCGACC  
 TCAAGCCCGAGAACATCATGCTGCTGGACAAGAGCGTGCCCAGCCCGCAC  
 ATCAAGCTCATCGACTTCGGCATCGCCCACAAGATTGAGGCCGGGAATGA  
 GTTCAAGAACATCTTCGGCACCCCGAGTTCGTGGCCCCCGAGATCGTCA  
 ACTACGAGCCGCTGGGCCCTGGAGGCTGACATGTGGAGCATTGGTGTTCATC  
 ACCTATATCCTGCTCAGCGGAGCATCCCCCTTCCTGGGGGAGACCAAGCA  
 GGAGACGCTGACCAACATCTCTGCAGTGAATTACGACTTTGACGAGGAAT  
 ATTTTCAGCAACACGAGTGAGCTGGCCAAGGACTTCATCCGCCGCTGCTG  
 GTC AAGGACCCCAAGAGGAGGATGACCATCGCGCAGAGCCTGGAGCACTC  
 CTGGATCAAGGCCATCCGGAGGCGCAACGTGCGCGGCGAGGACGGCGGGC  
 GCAGGCCGGAGCGGCGGCGGCTGCGCGCGGCGCGCCTGAAGGAGTACACC  
 ATCAAGTCGCACTCCAGCATGCCGCCAACAACAGCTACGCCAGCTTCGA  
 GCGCTTCTCGCGCGTGTGGAGGAGGTGGCGGCGGCCGAGGAGGGGCTGC  
 GCGAGCTGCAGCGCGGCCGGCGGCTGTGCCGCGAGGACGTGGAGGCGCTG  
 GCCGCCATCTACGAGGAGAAGGAGGCTGGTACACGGAGGAGCGCGACAG  
 CATCGGCCGCGACCTGCGGCGCTGCGGCAGGAGCTGCACAAGACGGAGG  
 CGCTGCAGCGGCAGGCGCAGGAGGAGGCCAAGGGCGCGCTGCTGGGCGCC  
 AGCGGGCTCAAGCGCCGCTTCAGCCGCTGGAGAACCGCTACGAGGCGCT  
 GGCCAAGCAGGTGGCGTCCGAGATGCGCTTCGTGCAGGAGCTGGTGC GCG  
 CGCTGGAGCAGGAGCGGCTGCAGGGCGGGAGTGC GGCCTGCGCTAG  
 >dapk3\_Kangaroo rat assembled\_TDB-  
 reads:((1527350676+1542302641+1556273330+1541211393+1578971935+1596066105+156291  
 2636+1552706462):(1164-  
 1523)))+((1569549916+1566271599+1585076393+1585061768+1542035913+1556201828+15412  
 00922+1586154871+1585648556+1535177412):(26-10+317-365+832-858+1502-1655+2363-  
 2407)))+(1569544450:112-22)+(1587085697:29-324) *Dipodomys ordii* (Ord's kangaroo  
 rat; a rodent) Death-associated protein kinase 3 (DAP kinase 3; DAP-like kinase;  
 Dlk; ZIP-kinase); partial missing N and C ends, an internal exon, and part of an  
 exon (shown as Ns), 1160 bases, 676C6F68 checksum.  
 GGCCAGTTTGCCATCGTGCGCAAGTGCCGGCAGAAGGGCACGGGCAAGGA  
 GTACGCCGCAAGTTCATCAAGAAGCGCCGCCTGTTCATCCAGCCGGCGGG  
 GCGTGAGCCGTGAGGAGATCGAGCGCGAGGTGAGCATCCTGCGGGAGATC  
 CGGCACCCCAACATCATCACGCTGCACGACGTCTTTGAGAACAAGACCGA  
 CGTGGTGTTCATCCTGGAGCTCGTGTCCGGCGGGGAGCTCTTCGACTTCC  
 TGGCCGAGAAGGAATCGCTGACGGAGGATGAGGCCACGCAGTTCCTCAAG  
 CAGATCCTGGACGGCGTCCACTACCTGCACTCCAAGCGCATTGCCCACTT  
 TGACCTCAAGNNNNNNNNNNNNNNNNNNNNNNNNNNNNNNNNNNNNNNNN  
 NNNNNNNNNNNNNNATCGACTTCGGCATCGCCCACAAGATCGAGGCTGGC  
 AACGAGTTCAAGAATATCTTTGGCACGCCTGAATTTGTGGCTCCTGAGAT  
 TGTAACTACGAGCCCTGGGCCCTGGAGGCAGACATGTGGAGCATCGGCG  
 TCATCACCTACATCCTCCTCAGCGGCGCGTCCCCGTTTCCTGGGGGAGACC  
 AAGCAGGAGACCTGACCAACATCTCTGCTGTGAACTACGACTTTGATGA  
 GGAGTACTTCAGCAGCACCAGCGAGCTGGCCAAGGACTTCATCCGCCGCC  
 TCCTGGTCAAAGACCCCAAGAGAAGGATGACCATCGCCCAGAGCCTGGAA

CATTCCTGGATCAAGGCCATCCGGCGGGCGCGGGTCCGCAGCGAGGACGG  
 CGGGAGGCGCGGGAGCGGGCGGGCGCTGCGCACCACGGCGCTGAAGGAGT  
 ACACNNNNNNNNNCACTCGAGCATGCCGCCAACAACCTCGTACGCCAAC  
 TTCGAGCGCTTCTCCAAGGTGCTGGAGGAGGTGGCGGGCGCCGAGGAGGG  
 GCTGCGCGAGCTGGAGCGCGGCCGGCGGCTGTGCCGCGAGGACGTGGAGG  
 CGCTGGCGGCCATCTACGAGGAGAAGGAGGCCTGGTACCGCGAGGAGAGC  
 GCCGGCCTGGGCCAGGACGTGCGGGCGCTGCGCCAGGAGCTGCACCGCGC  
 CGATGCGCTGCGGGCCAGGCGCACGAGGAGGTCCGGGCGGGCGCTGCTGG  
 GCTCTGGAAG

>dapk3\_Dog gi|73987436:1-1365 PREDICTED: *Canis familiaris* similar to Death-associated protein kinase 3 (DAP kinase 3) (DAP-like kinase) (Dlk) (ZIP-kinase) (LOC476745), mRNA, 1365 bases, F40F6429 checksum.

ATGTCCACATTCAGGCAGGAAGACGTGGAAGACTACTATGAGATGGGGGA  
 GGAGCTGGGCAGCGGCCAGTTTTCGATTGTGCGGAAATGCCGGCAGAAGG  
 GGACTGGGAAGGAGTATGCGGCCAAGTTCATCAAGAAGCGCCGCCTGTCTG  
 TCCAGCCGGCGGGGAGTAAGCCGGGAGGAGATCGAGCGGGAGGTGAACAT  
 CCTACGGGAGATCCGGCACCCCAACATCATCACGCTGCACGACATCTTTG  
 AGAACAAGACTGACGTAGTGTCTCATCCTGGAGCTGGTCTCAGGCGGGGAG  
 CTCTTTCGACTTCTTGGCAGAGAAGGAGTCACTGACAGAGGACGAGGCCAC  
 CCAGTTCTCAAGCAGATCCTGGATGGTGTCCACTACCTGCACTCCAAGC  
 GCATTGCCCACTTTGACCTCAAGCCAGAAAACATCATGCTGCTAGACAAG  
 AACGTGCCCAACCCACGGATCAAGCTCATCGACTTTTGGCATCGCCACAA  
 GATCGAAGCGGGGAATGAGTTCAAGAACATTTTCGGCACCCCTGAATTTG  
 TGGCTCCAGAGATTGTCAACTATGAACCCCTGGGTCTGGAAGCAGACATG  
 TGGAGCATTTGGAGTCATCACCTATATCCTCCTGAGCGGGCGCCTCCCCATT  
 CCTGGGTGAGACCAAGCAGGAGACCCTGACCAACATCTCGGCTGTGAACT  
 ACGACTTTGACGAGGAGTATTTTCAGCAACACCAGCGAGCTGGCCAAGGAC  
 TTCATCCGCCGCTGCTTGTCAAGGACCCCAAGAGAAGAATGACCATCGC  
 CCAGAGCCTGGAGCATTCTTGGATCAAGGCGATCCGGCGGGCGGAACGTGC  
 GGCCTGAAGACAGTGGCCGGAAGCCCGAGCGGGCGCCTGAAGACGGCA  
 CGCCTCAAGGAGTACACCATCAAGTCCCCTCGAGCATGCCCCCAACAA  
 CACCTATGTCAACTTTGAGCGCTTCTCCAAGGTGCTAGAGGAGGTGGCGG  
 CGGCAGAGGAGGGTCTGCGGGGGCTGGAGCACAGCCGGCGCCTCTTCCAC  
 GAGGACATCGAGGCGCTGACGGCCATCTACGAGGAGAAGGAGGCCTGGTA  
 CAGGGAGGAGAACGAGAGCATCGGCCAGGACCTGCGGGCGCTGCGCCAGG  
 AGCTGCACAAGACGGAGGCGTTGACGCGGCAGGCCAGGAGGAGGCCAAG  
 GCGCCCTGCTGGGGGCCAGTGGGCTCAAGCGGCGCTTCAGCCGCCTCGA  
 GAACCGCTACGAGGCCCTGGCAAAGCAGGTGGCCTCCGAGATGCGCTTCG  
 TGCAGGATCTGGTGCGCGCCATGGAGCAGGAGAAGCTGCAGGGGGTGGAG  
 TGTGGCCTACGCTAG

>dapk3\_Cow gi|119894932:194-1558 PREDICTED: *Bos taurus* similar to ZIP-kinase (LOC525506), mRNA, 1365 bases, 41A61006 checksum.

ATGTCAACATTCAGGCAGGAGGATGTGGAAGACCACTATGAGATGGGAGA  
 GGAGCTGGGAAGCGGACAGTTTTCGAATTGTGCGGAAGTGCCGGCAGAAGG  
 GTACTGGGAAGGAGTATGCAGCCAAGTTCATCAAGAAGCGCCGCCTCTCG  
 TCCAGCCGCCGGGGAGTGAGCCGAGAGGAGATCGAGCGGGAGGTGAACAT  
 CCTGCGGGAGATCCGGCACCCCAACATCATCACACTGCATGACATCTTTG  
 AGAACAGGACGGACGTGGTGTCTTATCCTCGAGCTGGTCTCAGGTGGTGAG

CTCTTCGACTTCCTGGCCGAGAAGGAGTCACTGACCGAGGACGAGGCCAC  
 CCAGTTCCTCAAGCAGATCCTGGATGGTGTCCACTATCTGCACTCCAAGC  
 GCATCGCCCACTTCGACCTCAAGCCAGAAAACATCATGCTCCTGGACAAG  
 AATGTGCCCAACCCACGGATCAAGCTCATTGACTTTGGCATCGCCCACAA  
 GATCGAGGCAGGGAACGAGTTCAAGAACATCTTTGGGACCCCGGAGTTCG  
 TGGCTCCTGAAATTGTCAACTATGAGCCCCTGGGTCTGGAGGCAGACATG  
 TGGAGCATTGGCGTTATCACCTACATCCTGCTGAGTGGCGCGTCCCCGTT  
 CCTGGGTGAAACCAAGCAGGAGACCCTGACCAACATCTCGGCTGTGAATT  
 ACGACTTTGACGAGGAGTACTTCAGCAACACCAGCGAGCTGGCGAAGGAC  
 TTCATCCGCCGTCTGCTTGTCAAAGACCCCAAGAGGAGAATGACCATCGC  
 CCAGAGCCTGGAGCACTCCTGGATCAAGGCCATCCGGCGGAGGAATGTGC  
 GGCGGGAGGACAGCGGCCGGAAGCCAGAGCGGCGGCCTGAAGACGGCA  
 CGCCTCAAGGAGTACACCATCAAGTCGCACTCAAGCATGCCCCCAACAA  
 TACCTATATCAACTTCGAGCGCTTCTCAAAGTGCTGGAGGAGGTGGCGG  
 CGGCCGAGGAGGGCCTGCGCGGGCTGGAGCACAGCCGACGCCTGTTCCAT  
 GAGGACCTTGAGGCGCTGACGGCCATCTACGAGGAGAAGGAGGCCTGGTA  
 CCGTGAGGAGAACGAGAGCCTAGGCCAGGACCTGCGGCGGCTGCGCCAGG  
 AGCTGCACAAGACGGAGGCGCTGCAGCGGCAGGCACAGGAGGAGGCCAAG  
 GGGGCCCTGCTCGGGGCCAGTGGGCTCAAGCGCCGCTTTAGCCGCCTGGA  
 GAACCGCTACGAGGCGCTGGCCAAGCAGGTGGCCTCCGAGATGCGGTTTCG  
 TGCAGGATCTGGTACGCGCCATGGAGCAGGAGAAGCTGCAAGAGGGGGAG  
 TGCAGCCTCCGCTAG

>dapk3\_Bat 105860175:(6-134+762-810+4383-4409+5004-5156+5920-5965+6421-  
 6957)+assembled\_TDB-reads((976759098+964301557+981846460):(456-96)) Myotis  
 lucifugus (little brown bat) Death-associated protein kinase 3 (DAP kinase 3;  
 DAP-like kinase; Dlk; ZIP-kinase); partial missing N-part, two contigs joined by  
 a joint mate pair, 1303 bases, A3F80AC6 checksum.

CGGCCAGTTTGCCATTGTGCGGAAATGCCGGCAGAAGGGCACTGGGAAGG  
 AGTATGCAGCCAAGTTCATCAAGAAACGCCGCTGTCGTCCAGCCGGCGG  
 GGGGTCAGCCGGGAGGAGATCGAGCGGGAGGTGAACATCCTGCGGGAGAT  
 TCGGCACCCCAATATCATCACGCTACATGACATCTTTGAGAATAAGACCG  
 ATGTGGTGCTCATCCTGGAAGTGGTTTCTGGTGGGGAGCTCTTTGATTTT  
 TTGGCTGAGAAGGAGTCGCTGACAGAGGACGAGGCCACTCAGTTCCTTAA  
 GCAGATCCTGGATGGCGTCCACTACCTACCTCCAAGCGCATCGCCCACT  
 TTGACCTCAAGCCGAAAACATCATGCTCCTAGACNAGAACGTGCCCAAC  
 CCACGCATCAAGCTTATTGACTTTGGCATCGCTCACAAGATTGAAGCCGG  
 GAACGAGTTCAAGAACATCTTTGGCACCCCAAGAATTTGTTGCTCCTGAGA  
 TTGTCAACTATGAACCCCTGGGTCTGGAGGCGGACATGTGGAGCATTGGT  
 GTCATCACCTATATCCTTTTGGAGTGGCGCATCCCCATTCCTGGGTGAGAC  
 CAAGCAGGAGACCCTGACCAATATCTCAGCCGTGAACTATGACTTCGATG  
 AGGAGTACTTTAGCAACACCAGCGAGCTGGCCAAGGACTTCATCCGCCGG  
 CTGCTTGTCAAGGACCCCAAGAGGAGAATGACCATCTCCAGAGCCTGGA  
 GCATTCCTGGATCAAGGCGATCAGGCGGCGGAATGTGCGGAGGGAAGACA  
 GTGGCCGAAACCGGAGCGTCCGGCGCCTGAAGACAGCCCGCCTCAAGGAG  
 TACACTATCAAGTCCCATTCGAGCATGCCCCCAACAATACCTACATCAA  
 CTTCGAGCGCTTCTCCAAGGTACTGGAGGAGGTGGCGGCGGCCGAGGAGG  
 GCCTGCGTGGGCTGGAACACAGCCGGCGGCTCTTCCATGAGGACATCGAG  
 GCCCTGACAGCCATCTATGAAGAGAAGGAGGCCCTGGTACAGGGAGGAGAA

CGAGAGCATTGGCCAGGACCTGCGACGGCTGCGGCAAGAGCTGCACAAGA  
 CCGAGGCCCTCCAGCGGCAGGCCAGGAGGAGGCCAAGGGTGCCCTGCTA  
 GGGGCCAGCGGGCTCAAGCGCCGCTTCAGCCGCCTTGAGAACCGCTACGA  
 GGCTCTGGCCAAGCAGGTGGCCTCCGAGATGCGGTTTGTGCAGGATCTTG  
 TACGCGCCATGGAGCAGGAGAAGCAACAGGAGGTGGAATGTGGCCTCCGC  
 TAG

>dapk3\_Shrew 80402909:(1-324,1034-1163,1349-1397,1738-1764,2080-  
 2232;+FS\_corrections)+80402905:154-

690+assembled\_TDB\_reads:(838222606+892417228):(1033-

713))+((873967520+875830371+894062723+845045749+848969792):(478-520+770-1307))

Sorex araneus (European shrew) Death-associated protein kinase 3 (DAP kinase 3;  
 DAP-like kinase; Dlk; ZIP-kinase); concatnation of CDS from two contigs;

partial missing N-part, 1263 bases, 6F8AB504 checksum.

GGCACGGGCAAGGAATACGCGNNNNNNNNNNNNNNNAAGCGGCGCCTGTC  
 ATCCAGCCGGCGCGGGTGNAGCCGGGAGGAGATCGAGCGGGAGGTGGACA  
 TCCTGCGGGAGATCCGGCACCCCAACATCATCACGCTGCACGACGTGTTC  
 GAGAACAAGACGGACGTGGTGTCTATCCTGGAGCTGGTGTCCGGCGGCGA  
 GCTCTTCGACTTCCTGGCCGAGAAGGAGTCGCTGACCGAGGACGAGGCCA  
 CGCAGTTCCTCAAGCAGATCCTGGACGGCGTCCACTATCTGCACTCGAAG  
 CGCATCGCCACTTTGACCTCAAACCGGAGAATATCATGCTTCTGGACAA  
 GAACGTCGCCAGTCCCCGGATCAAGCTCATTGACTTCGGCATCGCCACA  
 AGATCGAAGCCGGGAACGAGTTCAAGAACATCTTCGGCACCCCGGAGTTT  
 GTGGCTCCTGAGATTGTCAACTACGAGCCCTGGGCCTGGAGGCTGACAT  
 GTGGAGCATCGGCCTTATCACCTACATCCTCTTGAGCGGCGCGTCCCCGT  
 TCCTGGGGGACACCAAGCAGGAGACGCTGACCAACATCTCGGCCGTCAAC  
 TACGACTTCGATGAGGAGTATTTACGACAGCACCAGCGAGCTGGCCAAGGA  
 CTTTCATCCGCCGGCTCCTGGTCAAGGACCCCAAGAGAATGACCATTGCCG  
 AGAGCCTGGAGCACTCCTGGATCAAGGCCATCCGGCGGCGGAACGTGCGG  
 CGGGAGGACAGCGGCAAGAAGCCAGAGCGGCGGCGCCTGAAGACCGCGCG  
 CCTCAAGGAGTACACCATCAAGTCGCACTCCAGCATGCCCCCAACCACA  
 CCTACATCAACTTCGAGCGCTTCTCCAAGGTGCTGGAGGAGGTGGCGGCG  
 GCCGAGGAGGGCCTGCGCGGCCTGGAGCACAGCCGGCGCCTGTGCCACGA  
 GGACGTGGAGGCACTCACGGCCATCTACGAGGAGAAGGAGGCCTGGTACC  
 GCGAGGAGCAGGAGGGCCTGGGCCAGGACCTGCGGCGGCTGCGCCAGGAG  
 CTGCACAAGACCGAGACGCTGCGGCGCCAGGCCAGGAGGAGGCAAGGG  
 CGCGCTGCTGGGCGCAACGGGCTCAAGCGCCGCTTCAGCCGCCTGGAGA  
 ACCGCTACGAGGCCCTGGCGCAGCAGCTGGCCTCCGAGATGCGCTTCGTG  
 CAGGACCTGGTGCACCATGGAGCAGGAGAAGCTGCAGGGCGGCCAGTG  
 CGGGCTGCGCTAG

>dapk3\_Opossum 84819837:(42776-43312+44038-44083+44551-44703+45397-45423+46553-  
 46601+46993-47122+47716-48076+51934-51995) Monodelphis domestica (opossum)

Death-associated protein kinase 3 (DAP kinase 3; DAP-like kinase; Dlk; ZIP-  
 kinase), 1365 bases, B083636 checksum.

ATGTCTACGTTACAGGCAGGAGGATGTGGAAGACCACTATGAGATGGGTGA  
 GGAGCTGGGCAGTGGTCAGTTTGTCAATTGTACGGAAATGTCGTCAGAAGA  
 GCAATGGTATGGAGTATGCAGCTAAGTTTATCAAGAAGCGACGCTTGTC  
 TCCAGCCGTCGCGGGGTGAGCCGGGAGGAGATAGAAAGGGAGGTGGACAT  
 TCTTCGGGAAATCCAGCACCCCTAACATCATTACCCTTCATGACATCTTTG



AGAACAAGACTGATGTAGTATTAATCTTGGAAC TGGTTTCTGGGGGTGAG  
 CTCTTTGATTTCTTGGCTGAAAAGGAGTCCCTAACTGAGGAAGAGGCTAC  
 CCAGTTCCTTAAGCAGATCTTAGATGGTGTCCATTATCTGCACTCCAAGC  
 GAATTGCCCATTTTGATTTAAAGCCAGAGAACATCATGCTTCTGGATAAG  
 AATGTGCCCAACCCTCGAATCAAGCTCATTGATTTTGGTATTGCCATAA  
 AATTGAGGCAGGGAATGAGTTCAAGAACATTTTGGAAACCCAGAGTTTG  
 TGGCTCCTGAGATTGTGAACTATGAACCATTAGGATTGGAGGCTGATATG  
 TGGAGCATTTGGCGTGATCACATACATTCTTTTGGAGTGGAGCATCACCATT  
 CTTGGGGGAAACCAAGCAGGAGACTCTCACCAACATTTTCAGCTGTGAACT  
 ATGACTTTGATGAAGAGTATTTTCAGTAATACCAGCGAGCTGGCCAAGGAC  
 TTCATCCGACGACTGCTTGTCAAAGATCCTAAGAAAAGGATGACCATTGA  
 CCAGAGCCTGGAGCATTTCATGGATTAAGGTGATTAAGAGGAGGAATGTGC  
 GGAATGAGGACAGTGGCAAGAAGCCAGAGCGGCGTTCGGCTGAAGACAACC  
 CGCCTCAAGGAGTACACTATCAAGTCTCACTCAAGCATGCCCCAAACAA  
 CACATACATTAATTTTGAGCGCTTCTCTAAGGTTCTCGAGGAGGTGGCAG  
 CAGCTGAAGAGGGCCTTCGGGAGCTGGAACGAAGCAAGAAACTGTTCCGT  
 GAGGATATTGAAGTCCTAACTTCGATCTATGAGGAGAAGGAAGCCTGGTA  
 TAAGGAGGAAAATGAGAGCATTGGCCAGGATCTGAGGCTGCTTCGTCAGG  
 AACTGCACAAGACAGAGGCACTGAAACGGCAGGCCCAAGAAGAGGCCAAG  
 GGGGCTCTGCTGGGGGCTAATGGGCTGAAACGCCGCTTCAGCCGCTAGA  
 GAACCGCTATGAGGCCCTGGTTAAGCAAGTGGCATCAGAGATGAGGTTTG  
 TTCAGGACCTGGTTTATGCCATGGAGCAGGAGAAAATGCAGGATGGGGAC  
 TGCAGTGTGCGTTAG

>dapk3\_Platypus 91473547:(3474-3834+4007-4136+5210-5258+6263-6289+6613-  
 6765+8023-8077+8407-8934) Ornithorhynchus anatinus (platypus) Death-associated  
 protein kinase 3 (DAP kinase 3; DAP-like kinase; Dlk; ZIP-kinase); partial  
 missing N-end, 1303 bases, 5BC04AE5 checksum.

CGGTCAGTTTTCGATTGTGCGGAAGTGTCCGCGAAGAGTAATGGGCTGG  
 AGTACGCGGCCAAGTTCATCAAAAAGCGTCGCCGTGTCGTCCAGCCGGCGG  
 GGGGTGAGCCGGGAAGAGATCGAGCGGGAAGTGGACATCCTGAGGGAGAT  
 TCAACACCCCAACATCATCACCTGCACGACATCTTTGAGAACAAGACGG  
 ACGTGGTGCTGATCCTGGAGCTGGTCTCTGGCGGGGAGCTCTTTGACTTT  
 CTGGCTGAGAAAGAGTCCCTGACTGAGGAGGAGGCCACTCAGTTTCTGAA  
 GCAGATCCTGGATGGGGTCCACTACCTGCACTCCAAGCACATTGCCCACT  
 TTGACCTAAAGCCTGAGAACATCATGCTTCTGGACAAGAATGTGCCCAAT  
 CCTCGCATCAAGCTGATCGACTTTGGCATTGCCACAAAATTGAGGCCGG  
 GAATGAGTTCAAGAACATCTTTGGGACCCCAAGAGTTCGTGGCTCCTGAGA  
 TCGTGAAC TACGAGCCCC TGGGGCTAGAGGCTGACATGTGGAGCATTGGA  
 GTGATCACCTACATCCTTTTAAAGCGGCGCATCTCCATTCTTGGGTGAAAC  
 CAAACAAGAGACCCTGACCAACATCTCGGCGGTGAACTATGACTTTGATG  
 AGGAATATTTTCAGTAACACCAGCGAGCTGGCCAAGGACTTCATCCGCCGA  
 CTACTCGTCAAGGACCCCAAGAAGAGGATGACCATTGCCAGAGCCTGGA  
 GCACTCCTGGATTAAGGTGAGGAGAAGGAGGAACGTGCGGAACGAGGACA  
 GCGGCAAGAAGCCCGAGCGGCGGCTGAAGACCACCCGGCTCAAGGAG  
 TACACCATCAAGTCCCACTCCAGCATGCCCCCAACAACACCTACATCAA  
 CTTTCGAGCGCTTCTCCAAGGTGCTGGAGGAAGTGGCAGCGGCCGAGGAGG  
 GCCTGAGGGAGCTGGAGCACAGTAAGAAGCTCTTCCGGGAGGACATCGAG  
 GCCCTGACCTCCATCTACGAAGAGAAGGAGGCCCTGGTACAAGGAGGAGAA

CGAGAGCATCGGCCAAGACCTGCGGCAGCTCCGCCAGGAGCTCCACAAGA  
 CGGAGGCCCTGAAGCGGCAGACCCAGGAAGAGGCCAAGGGGGCCCTGCTC  
 GCCGCCAACGGGCTCAAGCGGGGCTTCGGGCGGCTGGAGAACCCTTCGA  
 GGCCCTGGCCAAGCAGGTGGCGTCTGAGATGAGGTTTCGTGCAGGACCTGG  
 TCGGGGCCATGGAGCAGGAGAAGCTGCAGGAGAGCGACTGCAGCATCCGT  
 TAG

>dapk3\_Chicken ((NC\_006115.1:1990-1980K):(2069-2130+2706-3066+3912-4041+4262-  
 4310+4412-4441;4641-5162))+ (EST-25936497:4-659)+(BBSRC\_EST-604156336F1:1-  
 552)+(TDB\_read|227294367:(31-86+308-256+458-485+564-711)) Gallus gallus  
 (chicken) Death-associated protein kinase 3 (DAP kinase 3; DAP-like kinase; Dlk;  
 ZIP-kinase); assembly of genomic contig, ESTs and a sequence read, 1374 bases,  
 C471AF85 checksum.

ATGTCCACCTTCCGGCAGGAGAGCGTGGAGGACTTCTACGAGATGGGGGA  
 AGAGCTGGGCCACGGCCAATTCGCCATCGTGAGAAAATGCCGGGAGAGGA  
 AAACGGGCGTGGGAATACGCGGCCAAATTCATCAAGAAGCGGCGGCTGTCTG  
 TCGAGCCGTCGGGGTGTGAGCAGGGAGGAGATCGAGAGGGAGGTGGACAT  
 CCTGAGGGAGATCCAACACCCCAACATCATCACACTGCACGACATCTTCG  
 AGAACAAAGACGGACGTGGTGTGATCCTGGAGCTGGTGTTCGGGCGGGGAG  
 CTCTTCGACTTCCCTGGCCGAGAAGGAATCGCTGACGGAGGAGGAGGCCAC  
 GCAGTTCCTCAAGCAGATCCTGGACGGGGTGCATTACCTGCATTCCAAGC  
 GCATCGCACACTTTGACTTGAAGCCAGAGAACATCATGCTGCTGGATAAG  
 AACGTGCCCAACCCTCGCATCAAACCTCATTGACTTTCGGGATCGCCCACAA  
 GATTGAAGCTGGGAATGAGTTCAAGAACATATTTGGGACCCCGGAGTTTCG  
 TGGCACCAGAAATCGTGAACACTACGAGCCGCTGGGGCTGGAGGCCGACATG  
 TGGAGCATTGGGGTCATCACTTACATCCTGGAGAGCGGGGCGTCCCCCTT  
 CCTGGGGGAAACGAAGCAGGAGACCCTCACCAACATCTCCGCCGTCAACT  
 ACGACTTCGATGAGGAGTACTTCAGCAGCACCAGCGAGTTGGCCAAGGAC  
 TTCATCCGCCGGCTGCTGGTCAAGGACCCCAAGAAGAGGATGACCATAGC  
 TCAGAGCCTGGAGCACCCCTGGATCAAGGTGATCAAGAGGAGGAACGTCC  
 GCAACGAGGACAGCGGAAGAAGGCGGAGCAGCGGCGGCGGTTGAAGACG  
 ACGCGGTTGAAGGAATACACCATCAAGTCCCCTCCAGCATGCCGCCCAA  
 CAACACCTACGTCAACTTCGAGCGCTTCTCCAAAGTGATGGAGGAGGTGG  
 CGGCGGCGGAGGAGACCCTCCGCGAGATACAGAGGAACAAGAGATCCTTC  
 CGGGAGGACATCGAGGCCCTGCTGTCCATCTACGAGGAGAAGGAGTCGTG  
 GTACAAAGAGGAGAATGAGAGCATCGGCCGCGACCTGCGGCAGATCCGGC  
 AGGAGCTGCTCCGAGCTGAGTCCGCCCGGCGAGCGGGCGCAGGAGGAGAGC  
 AGGAATGTGATGCAGGCGGCCGGGGGCTGCGCCGGCGCTACCGGAGGTT  
 GGAGAAGCGCTACGGTGCCTTGCCGAGCAGGTGGCGTCCGAGGTGAGGT  
 TCGTGCAGGAGCTGCTTTGGTCCATCGAGAGGGAGAAGCTGCAGAGCGGC  
 GGAGAGGATGGAAGCATCCGCTGA

>dapk3\_Finch assembled\_TDB-reads\_(1241607171:(781-720+191-  
 68))+((1242613131+1422732028+1404775456+1277318751):(530-  
 890))+((1401310278+1277343563+1253220430+1397767862+1249786453+1290200497+139882  
 6774+1397636686+1423694077):(567-696+839-887+994-1020+1120-1272+1647-1692+1833-  
 2375)) Taeniopygia guttata (zebra finch) Death-associated protein kinase 3 (DAP  
 kinase 3; DAP-like kinase; Dlk; ZIP-kinase), 1371 bases, 711E18F5 checksum.  
 ATGTCCACTTCCGCCAGGAGAAGCGTGGAGGACTTCTATGAGATGGGCGA  
 AGAGCTGGGCAGCGGGCAGTTCGCCATCGTCCGCAAGTGCCGGGAGAGGA

AGACGGGCTGGAGTACGCGGCCAAGTTCATCAAGAAGCGGCGGCTGTTCG  
 TCCAGCCGCCGGGGCGTGAGCCGCGAGGAGATCGAGCGCGAGGTGGACAT  
 CCTGCGCGAGATCCAGCACCCCAACATCATCACCTGCACGACATCTTCG  
 AGAACAAAGACCCGACGTGGTGCTCATCCTGGAGCTGGTGTCCGGCGGGGAG  
 CTCTTCGACTTCTGGCCGAGAAGGAGTCCCTGACCGAGGAGGAGGCCAC  
 CCAGTTCTCAAGCAGATCCTGGACGGCGTGCACTACCTGCACTCCAAGC  
 GCATCGCCCACTTCGACTTGAAGCCAGAGAACATCATGCTGCTGGACAAG  
 AACGTGCCAAACCCTCGCATCAAACATCATCGACTTTGGGATCGCCACAA  
 GATCGAGGCTGGGAATGAGTTCAAGAATATCTTTGGGACCCAGAGTTTG  
 TAGCCCTGAAATTGTGAACTACGAGCCCTGGGGCTGGAGGCCGACATG  
 TGGAGCATCGGGTTCATCACCTACATCCTGCTGAGCGGAGCCTCCCCGTT  
 CCTGGGGGAGACCAAGCAGGAGACTGACCAACATCTCTGCTGTCAACT  
 ACGACTTCGATGAGGAATATTTTCAGCAACACCAGCGAGCTGGCCAAGGAC  
 TTCATCCGCCGCTGCTCGTCAAGGACCCCAAGAAGCGAATGACCATCGC  
 CCAGAGCCTGGAGACCCCGTGGATTAAGGTGATCAAGAGGAGGAACGTCC  
 GCAACGAGGACAGCTGCAAGAAGCCCGAGCGGCGCCGGCTGAAGACCACG  
 CGCCTGAAGGAGTACACCATCAAATCCCCTCCAGCATGCCCCCAACAA  
 CACTTACATCAACTTCGAGCGCTTCTCCAAGGTCATGGAGGAGGTGGCTG  
 CGGCCGAGGAGAGCCTCCGCGAGCTGGAGAGGAACAAGAAGTCCTTCCAG  
 GAGGACATCGAGGCGCTGCTGTCCATCTACGAGGAGAAGGAGTCGTGGTA  
 CAAGGAGGAGAACGAGAGCATCAGCCAGGACCTGCGGCAGATCCGGCAGG  
 AGCTGCAGAAGACGGAGGCGCTGAAGAAGCAGGCGCAGGAGGAGACCAAG  
 AGCGTGGTGCAGGCGGCCAACGGGCTCAAGCGGCGCTACCGCAAGCTGGA  
 GAACCACTACGAGGCCCTGGCCAAGCAGGTGGCCTCTGAGATGAAGTTTG  
 TGCAGGAGCTGGTGTGGTCCATCGAGCGGGAGAAGCTGCAGAGCAGCGAG  
 GCGACGGCAGCATCCGCTAA

>dapk3\_xenla gi|66911520:79-1437 *Xenopus laevis* hypothetical protein MGC114871,  
 mRNA (cDNA clone MGC:114871 IMAGE:5506395), complete cds, 1359 bases, F38A16EF  
 checksum.

ATGAGCGGATTCCGGCAGCAGAATGTCGATGACTTTTATGAAATGGGAGA  
 AGAATTGGGCAGCGGGCAGTTTGCAATTGTGCGGAAGTGCCGGGAGCGTT  
 CTACAGGTGTGGAGTATGCAGCTAAATTTATTAAGAAACGCCGATTGTCA  
 TCTAGCCGCCGAGGTGTGAGCCGAGAAGAAATTGAGAGGGAGGTAGACAT  
 ACTAAGAGAGATTCAGCACCCCAACATCATCACCTTACATGATGTGTTG  
 AGAATCGCACAGATGTGGTCCCTGATACTTGAGCTTGTCTTCTGGAGGGGAG  
 CTTTTTACTTTCTGGCACAAAAGGAAAGTTTAAGTGAGGAAGAGGCAAC  
 CATGTTCTGAAGCAGATACTTGATGGTGTTCATTATTTGCACCATAAGA  
 ATATTGCACATTTTGACCTTAAGCCAGAGAATATCATGCTTTTGGACCAG  
 AGTTCCCCCAGTCCAAGAATAAACTCATAGATTTTGGAAATTGCTCACAA  
 GATAGAGGCTGGGAATGAATTCAAAAATATCTTTGGAACCTGAAATTTG  
 TAGCTCCAGAAATCGTAAACTATGAGCCTTTGGGACTGGAAGCTGATCTG  
 TGGAGCATTTGGAGTTATCACTTACATTCTTCTCAGTGGAGCATCACCAT  
 TCTTGGAGACACCAAGCAGGAAACGTTGACTAACATTTTCAGGTGTGAATT  
 ATGATTTTGATGAAGAATATTTTCAGCAATACCAGTGAATTAGCTAAAGAT  
 TTTATTCGCCGGCTGTTGGTGAAGATCCAAAAAACGAATGACCATCGA  
 TCAGAGTTTAGAGCATTCATGGATTAAGGCTATCAAGCGCCGAAATGTCC  
 GACATGAGGACAGTGGAAAACGCCCTGAACGCCGTCGCCTGAAGACTACA  
 CGTTTAAAGGAATACACAATAAAATCACATTCTAGCATGCCTCCAAATAA

CACCTATGTGAATTTTGAAGGTTTAGCCATGTATTAGAGGAGCTGGGAG  
 CAGCAGAAGATGCACCTTCGTGAGCTTCAAAGAGTCAGGCCACCTCACGC  
 GAAGACCTGTGTGCCTTGCCTCTATCTACGAGGAAAAGGAAAGTTGGTA  
 CCATGAAGAGCAGGAAGGTGTTGGGCGTCAACTTGTAGGGCTCCGGCAAG  
 AACTGCAGCGCAGAGAGAGTCAGCGTCGGCAGGTACAGGAGGATTTAAGG  
 GGAGCTATGCTTAGTGCCAATGCTTTGAAGAGAAGGTTTGGTAAATTGGA  
 AAATAGATATGAGGCCCTGCAGGCACAATTTACTGCAGAAATGAGCTTTG  
 TGAAGATTTGTTAAAACTGTGGAGAGAGGTGAAGATGGATTAAGAGGA  
 GTGTGCTGA

>dapk3\_xentr gi|77622189:45-1403 *Xenopus tropicalis* finished cDNA, clone  
 TGas051f01, 1359 bases, E50E372C checksum.

ATGAGCGGATTCCGGCAGCAAAATGTCGATGACTTTTATGAAATGGGAGA  
 GGAAGTGGGCAGTGGGCAGTTTGAATTTGTGCGGAAATGCCGCGAGCGTT  
 CTACCGGTGTGGAGTATGCAGCCAAGTTTATTAAGAAGCGCAGATTGTCA  
 TCTAGTCGCCGAGGTGTGAGCCGTGAAGAAATGAGAGGGAGGTAGACAT  
 ACTAAGAGAAATTCAGCACCCCAACATCATCACCTTACATGATGTGTTG  
 AAAATCGCACAGATGTGGTCTGATACTTGAGCTGGTTTCTGGAGGGGAG  
 CTTTTTGACTTTCTGGCACAAGGAAAGTTTAAAGTGAGGAAGAGGCAAC  
 CATGTTTCTGAAGCAGATTCTTGATGGGGTTCACTATTTGCACCACAAGA  
 ATATTGCACATTTTGACCTCAAGCCAGAGAATATCATGCTTCTGGACCAC  
 AGCTCCCCCAGTCCAAGAATAAACTTATAGATTTTGAATTTGCTCACAA  
 GATAGAAGCTGGGAATGAATTCAAAAATATCTTTGGAATCCAGAATTTG  
 TAGCTCCTGAAATCGTAAACTATGAGCCATTAGGACTGGAAGCTGATATG  
 TGGAGCATTGGAGTCATCACATACATTCTCCTCAGTGGTGCATCACCATT  
 TCTTGGAGACACCAAGCAGGAACTCTGACCAACATTTCAAGGTGTGAATT  
 ATGATTTTGATGAGGAATATTTTCAGCAACACTAGTGAATGGCTAAAGAT  
 TTTATTCGTCGGCTATTGGTCAAAGATCCAAAAAAGAATGACCATTGA  
 TCAGAGTTTAGAGCATTTCGTGGATTAAGGCTATCAAGCGTCGAAATGTCC  
 GACATGAGGACAGTGGAAAACGTCCTGAACGTCGTCGCCTGAAGACTACT  
 CGTTTGAAGGAATACACAATAAAATCACATTCTAGCATGCCCCAAATAA  
 CACCTATGTGAATTTTGAAGATTTAGCCATGTGTTGGAGGAGCTAGGAG  
 CAGCAGAAGATGCACCTTCGTGAGCTTCAAAGAGTCAGGCCACCTCACGC  
 GAGGACCTTTGCGCCCTGCGCTCTATCTATGAGGAAAAGGAAAGTTGGTA  
 CCATGAAGAACAGGAAGGAGTTGGGCGCCAACACTAGTAGGGCTCCGGCAAG  
 AACTGCAGCGCAGAGAGGGTCAGCGTCGGCAGGTACAGGAGGATTTAAGG  
 GGAGCTATGCTTAGTGCCAATGCTCTGAAGAGAAGGTTTGGTAAACTGGA  
 AAATAGATATGAGGCCCTGCAGGTGCAGTTCAGTGCAGAGATGAGCTTTG  
 TGAAGATTTATTA AAAACTGTGGAGAGAGGTGGAGATGGATTAAGAGGG  
 GTTTGCTGA

>dapk3\_Zebrafish gi|125806427:60-1421 PREDICTED: *Danio rerio* hypothetical  
 LOC562194 (LOC562194), mRNA, 1362 bases, 9D7F7795 checksum.

ATGGCTGGCTTCAGGCAGGAGGATGTGGAGATCTACTATGACATGGGAGA  
 GGAGTTAGGAAGTGGCCAGTTTGCCATTGTGCGTAAATGCAAAGAAAAGA  
 GCAGCGAACTGAATATGCTGCCAAGTTTATCAAGAAGAGGCGTCTGTCC  
 TCCAGCAGACGAGGCGTGAGCCGGGAGGAGATTGAGCGCGAGGTGAACAT  
 CCTTCGGGAGATTCAGCACAGCAACATCATCACACTCCATGACATCTTTG  
 AGAACAAGACCGATGTGATCCTGATCCTGGAGCTGGTGTCTGGAGGAGAG  
 CTCTTTGACTTTTTGGCTGAGAAGGAGTCACTTACTGAGGAGGAGGCCAC

GCAGTTCCTCAAGCAAATTTCTGGACGGAGTTCACCTCCACTCTAAAC  
GCATCGCTCATTGACTTGAAGCCTGAAAACATAATGCTGTTGGATAAA  
AATGTGCCGAACCCCGAATCAAGTTGATCGATTTTGGAAATTGCACATCA  
GATTAAGGATGGAAATGAATTTAAAAACATCTTTGGAACTCCTGAGTTTG  
TTGCACCGGAAATTTGTAATTATGAACCCCTTGGGCTGGAGGCAGATATG  
TGGAGTATTGGAGTTATCACTTATATACTCTTGAGTGGGGCTTCTCCATT  
TCTTGGTGAGACCAAACAAGAAACACTTACCAATATTTTCAGCAGTCAACT  
ATGACTTTGACGAAGAGTACTTCAGCAACACAAGTGAACCTCGCGAAGGAC  
TTCATTCGGCGACTGCTCGTCAAGGATCCCAAAAAGAGAATGACAATCGA  
GGACAGTCTCCAGCACTCGTGGATCAAGGTCATTAAGAGACGAAATGTTT  
GACCCGAAGAGAGCGAGCGCAAGCCTGAACGCAGGCGTCTGAAGACCACC  
CGTCTCAAAGAGTACACCATCAAATCCCCTCCAGCATGCCTCCCAACAA  
CACCTACATCAACTTCGAGCGATTTTCCCAGGTCATGGAGGAGATCGCAG  
CGGCCGAAGAAGGTCTGCGAGAGCTGGAGAAAACCAACGATCGTGTGGC  
GAGGATGTGACCGCTCTGCTCTCAATATATGAGGAGAAGGAAAGCTGGTA  
CAAAGAGGAGAACGAAAGCATCGCCGCAGACCTCAGTCAGATCAAACAGG  
AGCTGCAGAAAGCACAAGCCCTGCGCAGGCAGAGCCAGGAGGAGGCACGC  
GCAGCCATGCTGTCAGCTAATGCCCTCAAACGCAAATTCGGACGACTGGA  
GAACCGATACGAAGTTCTGGCTGAGCAGATGGACTCCGAGGTGCGCTGGG  
TGGAGGAGCTGGTGCGCACCATTTCAGCTGAAAACCACTCGCAGCACC  
AGCATGGCTTGA

>dapk3\_Fathead minnow

NCBI\_assembled\_ESTs((72422020+73556779+73634852+73512480+73721434+72761900+73439  
047+73721433):(122-1483)) Pimephales promelas (Fathead minnow; fish) Death-  
associated protein kinase 3 (DAP kinase 3; DAP-like kinase; Dlk; ZIP-kinase),  
1362 bases, F4768BD7 checksum.

ATGGCTGGCTTCAGACAGGAGGATGTGGAGCTGTGCTATGAAATGGGAGA  
GGAGTTAGGAAGTGGACAGTTTGCCATTGTACGTAAATGTAAAGAAAAGA  
GCTCCGGAACAGAATATGCCGCCAAATTTATCAAGAAGAGACGGCTCTCA  
TCCAGTCGACGGGGCGTGAGCCGAGAGGAGATCGAACGAGAGGTGAACAT  
CCTCCGAGAGATTCAGCACAGCAACATTATTACCCTTCATGACATCTTTG  
AGAACAAGACTGACGTGATCCTGATCCTGGAGCTGGTGTCTGGAGGGGAG  
CTGTTTGACTTTCTGGCTGAGAAGGAGTCACTGACTGAGGAGGAGGCTAC  
GCAGTTCCTCAAGCAGATCCTGGATGGAGTCTTCTACCTACACTCTAAAC  
GCATAGCACACTTTGACTTGAAGCCTGAAAACATAATGCTGCTGGATAAA  
AATGTGCCGAACCCCGAATCAAATTTGATAGATTTTGGAAATTGCACATCA  
GATTAAGGATGGAAACGAATTTAAAAACATCTTCGGAACTCCTGAGTTTG  
TTGCACCAGAAATTTGTGAATTATGAACCCCTTGGCCTGGAGGCAGACATG  
TGGAGCATTTGGAGTTATCACATATATACTCTTGAGTGGAGCTTCTCCGTT  
TCTTGGCGAGACCAAACAAGAAACACTTACCAACATTTTCAGCTGTCAACT  
ATGACTTTGATGAAGAGTACTTCAGCAACACAAGTGAAGCTTGCCAAGGAC  
TTCATTCGCCGACTGCTGGTCAAGGATCCTAAGAAGCGAATGACAATCGA  
GGACAGTCTCCAGCACCCCTGGATCAAGGTGATTAAGAGGCGCAACGTTA  
GACCCGAAGAGAGCGAGCGCAAGCCGGAGCGCAGGCGTCTGAAGACCACC  
CGTCTGAAGGAGTACACTATCAAATCCCCTCCAGCATGCCTCCCAAAA  
CACCTACATCAATTTTCGAGCGCTTCTCTCAAGTCATGGAGGAGATCGCCG  
CGGCTGAGGATGGCCTACGAGAGCTGGAGAAGAACCAGCGCTCCTGCAGG  
GAGGATGTGGCCGCACTGCTATCCATCTTTGAGGAGAAGGAAAGCTGGTA

CAAGGAGGAGAACAAAAGCATCGCTGCCGATCTCAATCAGCTCAAACAGG  
 AGCTGCAGAAAGAACAAGCCCTGCGCAGACAGAGCCAGGAGGAGACCCGA  
 GCCACCATGCTGTGCGCCAATGCCCTCAAACGCAAGTTTGGTCGGTTGGA  
 GAACCGCTATGAAGTGCTAGCTGAGCAGATGGTCTCTGAGGTGCGCTGGG  
 TGGACGAGCTGGTGCCTCAATTTTCAGCTGAAAATGACACGCACAGCAAC  
 AGCATGGCTTAA

>dapk3\_Pufferfish (47223005:(1491884-1491945+1492415-1492775+1492882-  
 1493011+1493118-1493166+1493263-1493289+1493376-1493528+1493611-1493656+1493847-  
 1494383)) Tetraodon nigroviridis (freshwater pufferfish) Death-associated  
 protein kinase 3 (DAP kinase 3; DAP-like kinase; Dlk; ZIP-kinase); chromosome 15  
 SCAF14981, 1365 bases, 352ADE68 checksum.

ATGGCTGGCTTCAGGCAAGAGGATGTTGAGCTGTATTATGAGATGGGAGA  
 GGAGTTGGGCAGTGGACAGTTTGCATTGTCCGCAAGTGCAAGGAGAAGA  
 GCACGGGCGTGGAATACGCCGCAAGTTCATCAAGAAGCGGCGGCTCTCG  
 TCCAGCCGGCGGGGGGTGAGCCGCGAGGAGATCGAGCGCGAGGTGAACAT  
 CCTGAGGGAGATCCAGCACAGCAACATCATCACCTGCACGACATCTTCG  
 AAAACAAGACCCGACGTGATCCTGATCCTGGAAGTGGTGTCCGGAGGGGAG  
 CTGTTTACTTCCCTGGCCGAGAAGGAGTGCCTGACGGAGGAGGAGGCCAC  
 GCAGTTCCTGAAGCAGATTCTGGATGGCGTCCACTACCTGCACTCAAAC  
 GCATCGCGCACTTTGACCTCAAGCCCGAGAACATCATGCTGCTGGATAAA  
 AACGTCCCCAACCCAGGATCAAACCTGATCGATTTTGAATCGCTCATCA  
 GATTAAAGCGGGAAACGAGTTTAAAAACATTTTCGGAACGCCGGAGTTTG  
 TCGCTCCTGAAATAGTCAACTACGAGCCGCTCGGCCTGGAGGCTGACATG  
 TGGAGCATTTGGAGTAATTACATACATTCTGCTGAGCGGCGCGTCGCCGTT  
 TCTCGGCGAAACCAAGCAGGAGACCCTCACAAACATCTCAGCCGTCAACT  
 ACGACTTTGATGAGGAATACTTCAGCAACACCAGCGAACTGGCCAAGGAT  
 TTCATCCGCCGCTGCTGGTCAAGGACCCCAAGAAGAGAATGACCATCGA  
 TGTCAGCTTGGAGACCCCTGGATCAAGGTGATCAAGAGGCGAAACGTCC  
 GCCAGAGGAGAGGGACCACAAGACGGAGCGCCGCCCTGAAGACCACT  
 CGTCTGAAGGAGTACACCATCAAGTCCCCTCCAGCATGCCGCCCAACAA  
 CACTTACATCAACTTTGAGCGCTTCTCGCAAGTGTCTCGAGGAGATCGCAG  
 CGGCGGAGGAAGCCTGCGGGACCTGGAGCGCAACCAGCAGTCGTGTCGG  
 GAAGACGTGGCAGCGCTGCTGTCCATCTACGAGGAGAAGGAGGGCTGGTA  
 CAAGGAGGAGAACCAGAGCATCTCCAGCGACCTGAGCCACATCCGCCGCG  
 AGCTGCAGCACACTCAAGCCCAGCGCAAGAAGAGCCAGGAGGAGGCGCGC  
 TTCACCGCGCAGGCCGCCAACGTCTGAAGCGCAAGTTCGGGCGCTTGA  
 GAACCGGTACGAGGTGCTGGCCGAGCAGGTGGCGTCCGAGGTGCGCTGGG  
 TGGAGGAGCTGGTCAAGTCCATGTCCATAGAGAGGGGCGCCTCAGCCCC  
 AGCAGCATGCCCTGA

>dapk3\_Fugu (22419072:(16803-16864+17636-17996+18117-18246+18398-18446+18542-  
 18568+18662-18814+18894-18939+19084-19620)) Fugu rubripes (Japanese pufferfish)  
 Death-associated protein kinase 3 (DAP kinase 3; DAP-like kinase; Dlk; ZIP-  
 kinase), 1365 bases, 4A45E0D9 checksum.

ATGGCTGGCTTCAGGCAAGAAGATGTTGAGTTGTATTATGAAATGGGAGA  
 GGAGCTGGGCAGTGGGCAGTTTGAATTGTGCGTAAGTGTAAAGGAGAAGA  
 GCACGGGCGTGGAATACGCAGCCAAGTTCATCAAAAAGCGGCGGCTCTCC  
 TCCAGCCGGCGGGGCGTGAGTCGCGACGAGATCAAGCGCGAAGTGAACAT  
 CCTGAGGGAGATCCAGCACAGCAACATCATCACCTTGCACGACATCTTCG

AAAACAAGACCGACGTGATCCTGATCCTGGAGCTGGTGTCTGGAGGGGAG  
 CTGTTTCGACTTCCCTCGCCGAGAAGGAGTCGCTGACTGAGGAGGAGGCCAC  
 GCAGTTTCTGAAGCAGATCCTGGATGGCGTTCAGTATCTGCACTCCAAAC  
 ACATCGCACACTTTGACCTCAAGCCCGAGAACATCATGCTGCTGGATAAG  
 AACGTCCCTAACCCAGGATCAAGCTGATTGATTTTCGGCATTGCTCATCA  
 GATTAAAGCAGGAAACGAATTTAAGAATATTTTCGGAACGCCGGAGTTG  
 TCGCTCCTGAAATAGTCAACTATGAGCCACTTGGACTAGAAGCTGACATG  
 TGGAGCATTTGGAGTAATTACATACATTCTGCTGAGTGGCGCTTCGCCGTT  
 TCTCGGCGAAACCAAGCAGGAGACTCTCACAAACATCTCGGGCGTCAACT  
 ATGACTTTGATGAGGAATACTTCAGCAACACCAGTGAGCTGGCAAAGAC  
 TTCATACGCCGCTGCTGGTCAAGGACCCCAAGAAGAGAATGAAAATTGA  
 TGATAGCTTGGAGACCCCTGGATCAAGGTGATTAAGAGGCGAAATGTCC  
 GCCAGAGGAGAGGGACCACAAGACTGAGCGCCGCCCTGAAGACCACT  
 CGTCTGAAGGAGTACACCATCAAGTCCCCTCGAGCATGCCGCCAACAA  
 CACTTATATTAACTTTGAGCGCTTCTCACAAGTGCTCGAGGAGATTGCAG  
 CGGCGGAGGAAGGCCTAAGGGACCTGGAACGCAACCAGCAGTCGTGTCCG  
 GACGATGTGGCAGCACTGTTGTCCATTTACGAGGAGAAGGAGGGGTGGTA  
 TAAGGAGGAGAACCAGAGCATCTCCAGTGACCTGAGCTACATCCGCCAGG  
 AGCTGCAACGCACCCAAATCCAGCGCAAAAAGAGCATGGAAGAGGCCCGC  
 TTCACCACGCAGGCTGCCAATGTCTTAAAGCGCAAGTTTGGCCGCTTGA  
 GAACCGATACGAGATGCTGGCGGAGCAGGTGGCATCGGACGTCCGCTGGG  
 TGGAGGAGTTGGTCAAGTCCATCTCCTCAGAGAAAGCTGGCCTCGGCTCC  
 AGCACCATGCCCTGA

>dapk3\_Medaka fish (16991872:(1422-1483+1984-2344+2568-2697+2770-2818+2904-  
 2930+3014-3166+3355-3400+3554-4090)) *Oryzias latipes* (Japanese medaka fish)  
 Death-associated protein kinase 3 (DAP kinase 3; DAP-like kinase; Dlk; ZIP-  
 kinase), 1365 bases, 82D76130 checksum.

ATGGCTGGCTTCAGGCAGGAGGACGTGGAGCTGCATTATGAGATGGGAGA  
 GGAGCTGGGCAGCGGCCAGTTCGCCATCGTCCGTAAGTGCAGGGAGAAGA  
 GCACGGGCGGCGAGTACGCGGCCAAGTTCATCAAGAAGCGGCGTCTGTCC  
 TCCAGCCGGCGGGGGGTGAGCCGCGAGGAGATCGAGCGCGAGGTCAACAT  
 CCTGCGGGAGATCCAGCACAGCAACATCATCACCTGCACGACATCTTCG  
 AGAACAAGACCGACGTGATCCTGATCCTGGAGCTGGTGTCCGGAGGAGAG  
 CTCTTCGACTTCCCTCGCAGAGAAGGAGTCTTTGACCGAGGAGGAGGCCAC  
 GCAGTTCTGAAGCAGATCCTGGACGGCGTCCAGTACCTGCACTCCAAAC  
 GCATCGCTCACTTCGACCTCAAGCCGGAGAACATCATGCTGCTGGACAAG  
 AACGTTCCCAACCCAGGATCAAGCTGATCGACTTTGGGATCGCTCACCA  
 GATTAAAGCAGGAAACGAGTTCAAGAACATCTTCGGGACTCCAGAGTTTG  
 TGGCTCCTGAAATCGTCAACTACGAGCCGCTCGGCCTGGAGGCGGACATG  
 TGGAGCATCGGCGTGATCACGTACATCCTGTTGAGCGGAGCGTCTCCGTT  
 TCTGGGCGAGACCAAGCAGGAGACTTTGACCAACATCTCTGCCGTCAACT  
 ACGACTTTGACGAGGAGTATTTTCAGCAACACCAGCGAGCTCGCCAAGGAC  
 TTCATTCGCCGCTCCTGGTCAAGGATCCAAGAAGAGGATGACGATTGA  
 CGACAGTCTAGAGCATCCCTGGATTAAGGTCAATTAAGAGACGAAACGTCC  
 GGCCAGAGGAGGGAGACCAGAAGACCAAGCGCCGGCGCCTGAAGACCACC  
 CGTCTGAAGGAGTACACCATCAAGTCCCCTCCAGCATGCCCCCAACAA  
 CACCTACGTCAACTTCGAGCGCTTCTCCAGGTGCTGGAGGAGATCGCGG  
 CTGCAGAGGAGGGCCTGAAGGAGCTGGAGCACAACCAGCGCTCCTGCCAG

GAGGACGTGGCGGCGCTGCTGTCCATCTACGAGGAGAAGGAGGGCTGGTA  
 CAAGGAGGAGAACCAGAGCATCTCCTTAGACCTGAGCCACATCCGCCAAG  
 ACCTGCAGCGCACCCAGGCCAGCGGAAGAAGTGCCAGGAGGAGACGCGG  
 CTCACCACGCAGGCCGCCAGCATCCTGAAGCGCAGGTTTCGGCCGCTGGA  
 GAACCGGTACGAGGTCCTGGCGGAGCAGGTGGCCTCAGAGGTGCGCTGGG  
 TGGAGGAGCTGGTGAAGTCCTTTTCTGAGGAGAAGGCCGCCCTGAGCCCA  
 GTCAGCTTGGCCTAG

>dapk3\_Stickleback ((AANH01005391.1:370001-380000):(3354-3415+4304-4664+5059-  
 5188+5374-5422+5515-5541+5661-5813+5916-5961+6385-6915)) *Gasterosteus aculeatus*  
 (three spined stickleback fish) Death-associated protein kinase 3 (DAP kinase 3;  
 DAP-like kinase; Dlk; ZIP-kinase), 1359 bases, 24AD1166 checksum.

ATGGATGGCTTCAGACAAGAGGATGTTGAGTTGTTTTATGAAATGGAAGA  
 GGAGTTGGGCAGTGGACAATTTGCCATCGTCCGCAAGTGTAAGAAAAGA  
 GCACGAGTATCGAGTACGCAGCAAAGTTCATCAAAAAGCGGCGACTGTCA  
 TCCAGCCGGCGGGGGGTGAGCCGCGAGGAGATCGAGCGCGAAGTCAACAT  
 CCTGCGGGAGATCCAACACAGCAACATCATCACCCTGCACGACATCTTTG  
 AGAACAAAGGCCGACGTGATCCTGATCCTGGAGCTGGTGTCCGGAGGAGAA  
 CTGTTTTGACTTCTGGCTGAGAAGGAATCTCTGACGGAGGAGGAGGCCAC  
 CCAGTTCTCAAGCAGATCCTGGATGGCGTCCAGTACCTCCACTCCAAAC  
 GCATCGCTCACTTTGACCTCAAGCCTGAGAACATCATGCTGCTGGACAAG  
 AACGTCCCGAACCCAGGATCAAGCTCATCGATTTTGAATCGCGCACCA  
 GATAAAAGCGGGAAACGAGTTCAAGAACATATTCGGAACGCCAGAGTTTG  
 TCGCTCCAGAAATAGTCAACTACGAGCCGCTCGGACTGGAGGCGGACATG  
 TGGAGCATCGGAGTCATCACGTACATCCTACTGAGCGGCGCTTCGCCGTT  
 CCTGGGCGGAGACTAAGCAGGAGACGCTGACCAACATCTCGGCCGTCAACT  
 ACGACTTCGATGAAGAGTATTTTCAGTAACACCAGTGAGCTGGCAAAGGAC  
 TTCATACGCCGCTGCTGGTCAAGGATCCGAAGAAGAGAATGACAATTGA  
 TGACAGTCTTGAGCACCCTTGGATCAAGGTTATTAAGAGGCGAAATGTCC  
 GCCAGGAGGAGAGAGACCACAAGACCGAGCGACGGCGCCTGAAAACCACT  
 CGTCTGAAGGAGTACACCATCAAGTCCCCTCCAGCATGCCCCCAACAA  
 CACCTACGTCAACTTTGAGCGCTTCTCCAGGTCCTGGAGGAGATCGCCG  
 CGGCAGAGGAGGGCCTGAGGGACCTGGAGCGCAACCAGCGCTCGTGCCGA  
 GAGGACGTGGCGGCGCTGCTGTCCATATACGAGGAGAAGGAGGGTTGGTA  
 CAAGGAGGAGAACCAGAGCATCTCCAGCGACCTGAGTCACATCCGCCAAG  
 AGCTGCAGCGCACTCAAGCCCAGCGCAAGAAGAGCCAGGAGGAGGCCCGG  
 CTCACCATGCAGGCCGCCAGCATCCTCAAGCGCAAGTACGGCCGCTGGA  
 GAACCGCTACGAGGTCCTGGCCGAGCAAGTGGCCTCCGAAGTCCGCTGGG  
 TGGAGGAGCTGGTCAAGTCCATGTCGGCGGAGAGGAGCGGCCTCGGCAGC  
 ATGGCCTGA

>dapk3\_Astatotilapia 46489038:1-550 *Astatotilapia burtoni* (Cichlid fish) cDNA  
 clone hh\_Ab\_Brain2000\_000004668 5', mRNA Death-associated protein kinase 3 (DAP  
 kinase 3; DAP-like kinase; Dlk; ZIP-kinase); partial EST missing N-part, 550  
 bases, 3BC9646F checksum.

GCCAGGAGGACAGAGATCACAAGACTGAGCGCCGGCGCCTGAAGACTACT  
 CGTCTCAAGGAGTATACCATCAAGTCCCCTCCAGCATGCCTCCGAACAA  
 CACCTACGCCAACTTTGAGCGCTTCTCCAGGTCCTCGAGGAGATTGCGG  
 CGGCTGAGGAAGGCCTGAAGGAGTTGGAGCGCAACCAGCGCTCTTGCCGC  
 GAGGACGTGGCAGCGCTGCTATCGATATATGAGGAGAAGGAGGGGTGGTA



CAAGGAAGAGAACCAGAGCATCTCTGGTGACCTGAACCACATCCGCCAAG  
AGCTGCAGCGCACGCAGACGCAGCGCAAGAAGTGCCAGGAGGACGCGCGG  
GTCACTATGCAGTCGGCCAACATCCTCAAGCGCAAGTTTGGGCGCCTGGA  
GAACCGCTACGAGGTCCTGGCCGAGCAGGTGGCCTCCGAGGTCCGCTGGG  
TGGAGGAGCTGGTGAAGTCAATATCGGCAGAGAAGGACGGCCTCAGCTCT  
GGCAGCACGCCGTGAGCGGCGCTGACATCCAGCAGTGAGGGTTTCATCAT
